# Supplementary material for: Cost-Effectiveness Analysis of Stereotactic Ablative Body Radiotherapy for the Treatment of Oligometastatic Tumors versus Standard of Care
Source: MDPI journal article supplement (doi:10.3390/curroncol28030172), 2021-05-13
Supplement: s1 [file s1]

## SUPPLEMENTARY MATERIAL

### Cost-Effectiveness Analysis of Stereotactic Ablative Body Radiotherapy for the Treatment of Oligometastatic Tumors Versus Standard of Care

Adam J.N. Raymakers, David Cameron, Scott Tyldesley and Dean A. Regier

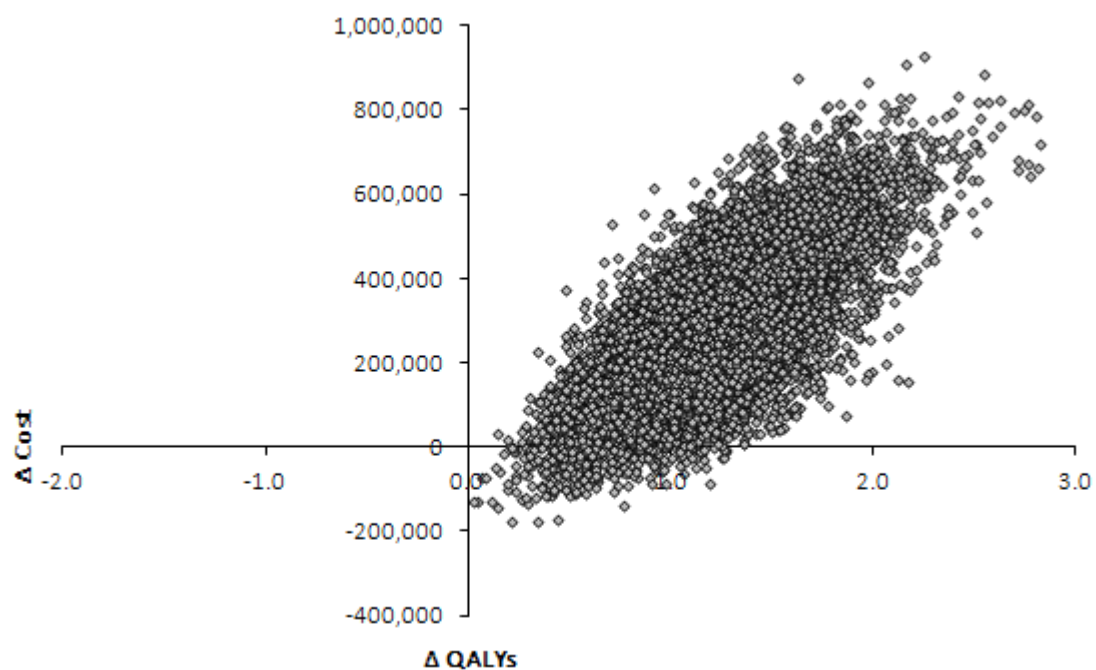

**Figure S1.** Using a ten year time horizon, scatter plot of probabilistic incremental cost-effectiveness ratios (ICERs).

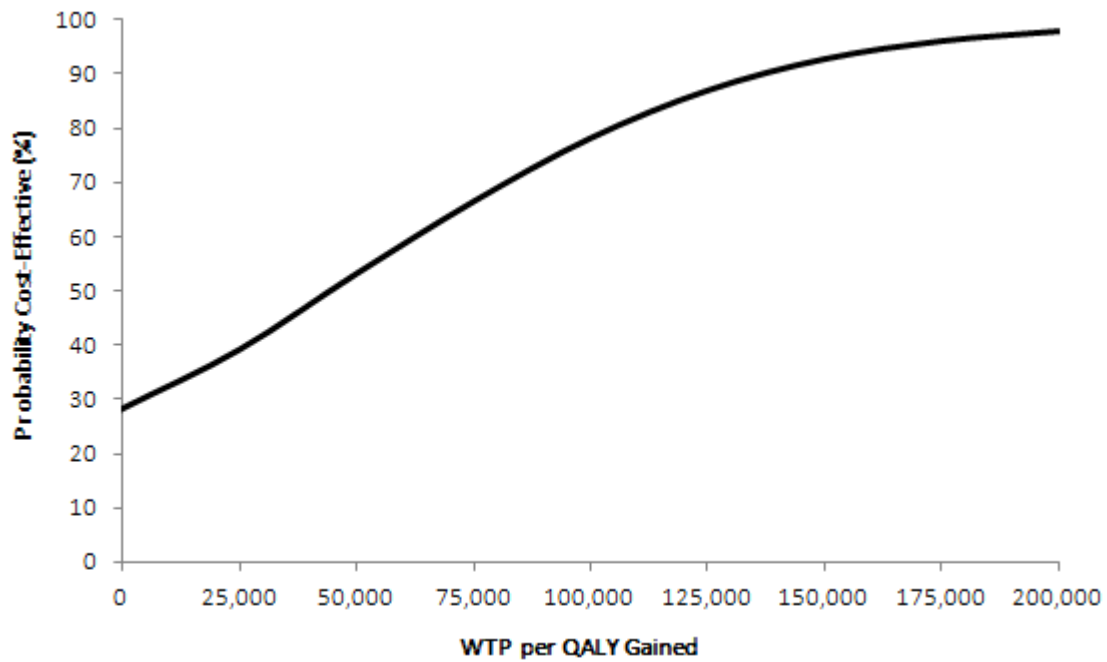

**Figure S2.** Cost-effectiveness acceptability curve (CEAC) of the ICER using a ten year time horizon. QALY: quality-adjusted life-year; WTP: willingness-to-pay. .

**Table S1.** Estimated upfront time-zero cost estimate for the introduction of SABR based internal BC Cancer costing.

| Equipment & Training Costs                                   | Cost (CAD\$)       |
|--------------------------------------------------------------|--------------------|
| Immobilization device                                        | \$61,959           |
| Linear accelerator                                           | \$4,135,000        |
| Additional hardware and software                             | \$1,236,269        |
| Software training costs                                      | \$3,000            |
| Dedicated planning workstation                               | \$79,288           |
| Auto-segmentation and auto-contouring software               | \$500,000          |
| Tracking devices                                             | \$350,000          |
| Training (including estimated travel for 1 RT & 1 physicist) | \$2915             |
| <b>Total:</b>                                                | <b>\$6,368,431</b> |

An average of 71 SBRT treatments were conducted at each cancer treatment site in BC in 2017 (the most recent observed year that data is available for). Equipment & Training Costs (upfront costs) per patient:  $\$6,368,431/71 = \$89,696$  (2018 CAD\$).

Costs have been adjusted to 2018 CAD\$ using a historical currency conversion tables and adjusted for inflation.

**Table S2.** Cancer costs by site.

#### Breast

Capecitabine (BRAVCAP) was used for the treatment of metastatic breast cancer. Dosage was assumed to be 2000 to 2500 mg/ day for two of every three weeks, typically 6-8 cycles. Cost was assumed to be \$6.97 per day (2015 CAD\$)

$\$6.97 \times 90 = \$627.30$  (2015 CAD\$)

3 month cost: **\$659.87** (2018 CAD\$)

### *GI*

Gemcitabine + Cisplatin (GIAVPG) used for the treatment of metastatic colon cancer. Dosage was assumed to be gemcitabine 1000 mg/m<sup>2</sup> on days 1 and 8 of 21 day cycle and cisplatin 25 mg/m<sup>2</sup> on days 1 and 8 of 21 day cycle. Monthly drug cost was assumed to be \$44,574 (2016 USD\$).

$$44,574 * 3 = 133,722 \text{ (2016 USD\$)}$$

3 month cost: **\$186,004.39 (2018 CAD\$)**

### *Lung*

Erlotinib (LUAVERL) was used for the treatment of metastatic lung cancer. Dosage was assumed to be 150mg taken daily.

Cost was assumed to be \$5,751 (2015 USD\$) per month (150mg taken daily). Includes the administration cost of one outpatient office visit for initial prescription. All drug prices are average wholesale price minus 17%).

$$5,751 * 3 = \$17,253 \text{ (2015 USD\$)}$$

3 month cost: **\$22,601.43 (2018 CAD\$)**

### *Prostate*

Standard of care in castration-resistant prostate cancer was assumed to be docetaxel and prednisone.

Dosage was assumed to be Prednisone 5 mg twice daily and Docetaxel 75 mg/m<sup>2</sup> administered every 3 weeks.

Cost was assumed to be £454.53 per 80 mg vial (2015) for docetaxel and

Prednisone oral solution (5 mg/mL) was assumed to be \$119 for a supply of 30 ml

$$6 \text{ month cost of docetaxel: } 8.666 * 454.53 = 3,930.29 \text{ (2015 £)}$$

$$= \$8,351.45 \text{ (2018 CAD\$)}$$

$$6 \text{ month cost of Prednisone: } 60 * \$119 = 7,140 \text{ (2019 USD\$)}$$

$$= \$9,181.71 \text{ (2018 CAD\$)}$$

Total 6 month cost: \$17,533.16 (2018 CAD\$)

Total 3 month cost: **\$8,766.58 (2018 CAD\$)**

**Table S3.** Patient distribution for the SABR arm in SABR-COMET.

| Site       | Percentage |
|------------|------------|
| Breast     | 20%        |
| Colorectal | 14%        |
| Lung       | 18%        |
| Prostate   | 21%        |
| Other      | 26%        |

**Table S4.** Patient distribution for the SABR arm in SABR-COMET normalized to exclude 'Other'.

| Site       | Percentage |
|------------|------------|
| Breast     | 27%        |
| Colorectal | 19%        |
| Lung       | 24%        |
| Prostate   | 28%        |

**Table S5.** Patient distribution for the SABR arm in SABR-COMET weighted cost (per 3 month period):.

| Site          | Cost (2018 CAD)    |
|---------------|--------------------|
| Breast        | \$178.16           |
| Colorectal    | \$35,340.84        |
| Lung          | \$5,424.34         |
| Prostate      | \$2,454.64         |
| <b>Total:</b> | <b>\$43,397.98</b> |

In the Progression/Systemic Therapy health state, patients will experience costs of **\$43,397.98** per 3 month period. Extrapolated overall survival and progression-free survival curves from the SABR-COMET trial – 10 year time horizon.

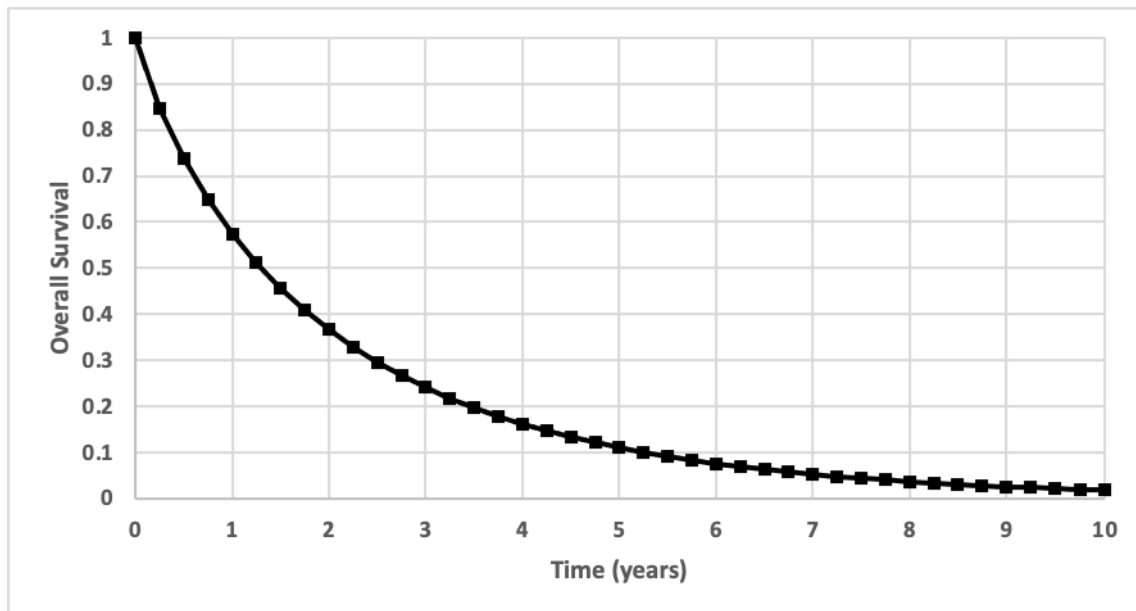

**Figure S3.** Extrapolated overall survival curve for the SABR model arm.

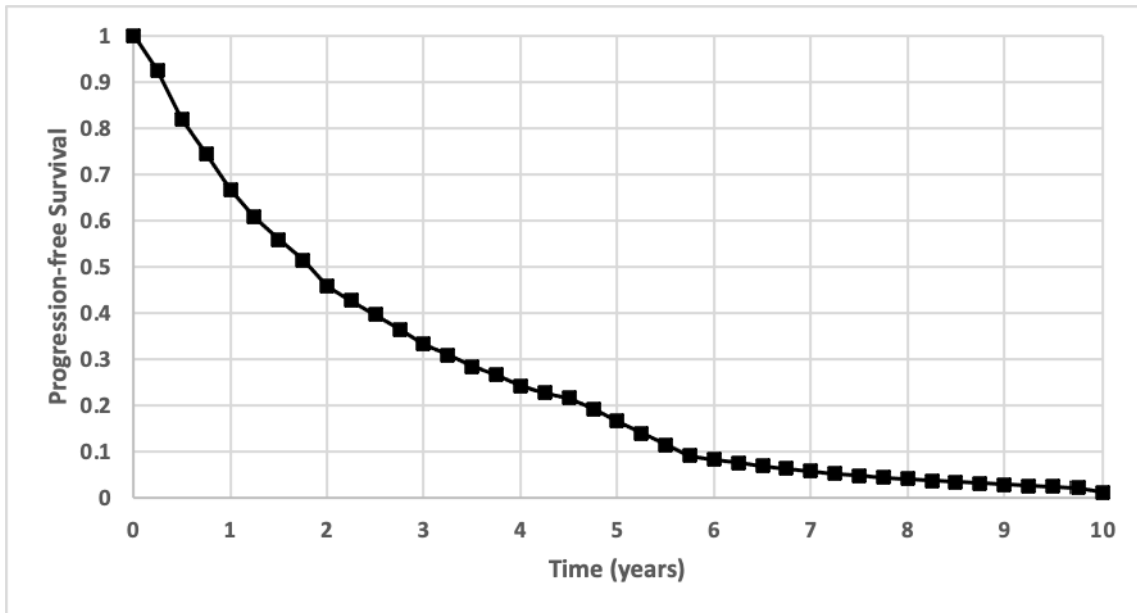

**Figure S4.** Extrapolated progression-free survival curve for the SABR model arm.
